# Supplementary material for: Association of cardiac troponin T and growth differentiation factor 15 with replacement and interstitial cardiac fibrosis in community dwelling adults: The multi-ethnic study of atherosclerosis
Source: PubMed Central journal article supplement (PMC9949377; doi:10.3389/fcvm.2023.1104715), 2023-02-09
Supplement: Data_Sheet_1.pdf [file Data_Sheet_1.pdf]

## **Supplemental Material**

Supplemental Tables 1a-1b.

Supplemental Tables 2a-2b.

Supplemental Table 3.

## Supplemental Tables

**Supplemental Table 1a.** Patient Characteristics, by GDF-15 quartile (ng/L), among those with complete LGE measures without incident CVD (n=1737).

|                                   | <b>Quartile 1</b><br>(<738 ng/L) | <b>Quartile 2</b><br>(738-973 ng/L) | <b>Quartile 3</b><br>(973-1347 ng/L) | <b>Quartile 4</b><br>(≥1348 ng/L) | <b>p-value</b> |
|-----------------------------------|----------------------------------|-------------------------------------|--------------------------------------|-----------------------------------|----------------|
| Age                               | 61.7 (5.4)                       | 65.8 (6.5)                          | 71.1 (8.5)                           | 73.1 (9.4)                        | <.001          |
| Male                              | 73 (46.2%)                       | 81 (50.9%)                          | 75 (47.8%)                           | 86 (53.8%)                        | 0.3            |
| Race                              |                                  |                                     |                                      |                                   |                |
| Caucasian                         | 187 (43.1%)                      | 185 (42.6%)                         | 185 (42.5%)                          | 218 (50.1%)                       | 0.2            |
| Chinese American                  | 41 (9.5%)                        | 40 (9.2%)                           | 52 (12.0%)                           | 31 (7.1%)                         |                |
| Black                             | 109 (25.1%)                      | 119 (27.4%)                         | 106 (24.4%)                          | 98 (22.5%)                        |                |
| Hispanic                          | 97 (22.5%)                       | 90 (20.7%)                          | 91 (21.0%)                           | 88 (20.2%)                        |                |
| Hypertension                      | 73 (46.2%)                       | 82 (51.6%)                          | 103 (65.6%)                          | 114 (71.3%)                       | <.001          |
| Diabetes                          | 8 (5.1%)                         | 20 (12.6%)                          | 21 (13.4%)                           | 59 (36.9%)                        | <.001          |
| Smoking                           |                                  |                                     |                                      |                                   |                |
| Never                             | 219 (50.8%)                      | 190 (43.8%)                         | 185 (42.8%)                          | 160 (37.0%)                       | .001           |
| Former                            | 190 (44.1%)                      | 200 (46.1%)                         | 215 (49.5%)                          | 229 (52.9%)                       |                |
| Current                           | 22 (5.1%)                        | 44 (10.1%)                          | 33 (7.6%)                            | 44 (10.2%)                        |                |
| HDL-C                             | 55.6 (16.7)                      | 53.5 (15.9)                         | 54.7 (16.7)                          | 51.9 (13.2)                       | .06            |
| LDL-C                             | 110.1 (29.2)                     | 109.9 (27.5)                        | 103.2 (31.2)                         | 94.4 (34.2)                       | <.001          |
| Total Chol                        | 187.2 (35.6)                     | 185.3 (32.4)                        | 180.6 (36.3)                         | 168.5 (38.3)                      | <.001          |
| BMI (kg/m <sup>2</sup> )          | 28.4 (4.9)                       | 28.5 (5.1)                          | 28.2 (5.1)                           | 28.4 (5.6)                        | 0.8            |
| eGFR (ml/min/1.73m <sup>2</sup> ) | 78.6 (11.3)                      | 74.7 (12.3)                         | 71.0 (11.8)                          | 66.1 (13.9)                       | <.001          |

|                                                                                                                                                                                                                                                                                                                                                           |              |              |              |              |       |
|-----------------------------------------------------------------------------------------------------------------------------------------------------------------------------------------------------------------------------------------------------------------------------------------------------------------------------------------------------------|--------------|--------------|--------------|--------------|-------|
| SBP (mm Hg)                                                                                                                                                                                                                                                                                                                                               | 117.9 (18.2) | 122.2 (20.0) | 124.4 (18.7) | 124.7 (19.1) | <.001 |
| DBP (mm Hg)                                                                                                                                                                                                                                                                                                                                               | 69.4 (10.4)  | 70.4 (9.9)   | 69.1 (9.1)   | 66.9 (9.2)   | <.001 |
| Prevalent LGE                                                                                                                                                                                                                                                                                                                                             | 11 (2.5%)    | 24 (5.5%)    | 38 (8.8%)    | 39 (9.0%)    | <.001 |
| LVEF (%)                                                                                                                                                                                                                                                                                                                                                  | 62.6 (6.5)   | 62.2 (6.4)   | 61.6 (7.3)   | 61.6 (7.1)   | 0.07  |
| LVEDVI                                                                                                                                                                                                                                                                                                                                                    | 67.8 (12.4)  | 66.3 (13.8)  | 66.3 (13.6)  | 63.0 (13.6)  | <.001 |
| LV mass (g)                                                                                                                                                                                                                                                                                                                                               |              |              |              |              |       |
| Male                                                                                                                                                                                                                                                                                                                                                      | 148.6 (30.6) | 150.0 (30.2) | 144.4 (30.0) | 141.1(27.3)  | 0.002 |
| Female                                                                                                                                                                                                                                                                                                                                                    | 103.9 (19.8) | 105.1 (20.8) | 104.8 (23.1) | 105.1 (23.2) | 0.6   |
| Blood pressure, BP; Body mass index, BMI; Cardiac magnetic resonance, CMR; Estimated glomerular filtration rate, eGFR; Extra cellular volume, ECV; High density lipoprotein cholesterol; HDL-C; Hypertension, HTN; Low density lipoprotein cholesterol, LDL-C; Left ventricular diastolic volume index, LVEDVI; Left ventricular ejection fraction, LVEF. |              |              |              |              |       |

**Supplemental Table 1b.** Patient Characteristics, by GDF-15 quartile (ng/L), among those with complete ECV measures and without incident CVD (N=1258).

|                                   | <b>Quartile 1</b><br>(<736 ng/L) | <b>Quartile 2</b><br>(736-971 ng/L) | <b>Quartile 3</b><br>(972-1341 ng/L) | Quartile 4<br>(≥1342l ng/L) | <b>p-value</b> |
|-----------------------------------|----------------------------------|-------------------------------------|--------------------------------------|-----------------------------|----------------|
| Age                               | 61.2 (5.5)                       | 65.4 (6.8)                          | 70.3 (8.0)                           | 72.6 (9.2)                  | <.001          |
| Male                              | 151 (48.1%)                      | 154 (48.9%)                         | 169 (54.0%)                          | 170 (53.8%)                 | .08            |
| Race                              |                                  |                                     |                                      |                             | 0.3            |
| Caucasian                         | 155 (59.4%)                      | 157 (49.8%)                         | 150 (47.9%)                          | 184 (58.2%)                 |                |
| Chinese American                  | 39 (12.4%)                       | 36 (11.1%)                          | 43 (13.7%)                           | 26 (8.2%)                   |                |
| Black                             | 71 (22.6%)                       | 79 (25.1%)                          | 76 (24.3%)                           | 63 (19.9%)                  |                |
| Hispanic                          | 49 (15.6%)                       | 44 (14.0%)                          | 44 (14.1%)                           | 43 (13.6%)                  |                |
| Hypertension                      | 127 (40.5%)                      | 147 (46.7%)                         | 182 (58.2%)                          | 205 (64.9%)                 | <.001          |
| Diabetes                          | 18 (5.7%)                        | 36 (11.4%)                          | 41 (13.1%)                           | 98 (31.0%)                  | <.001          |
| Smoking                           |                                  |                                     |                                      |                             |                |
| Never                             | 156 (50.0%)                      | 138 (43.8%)                         | 129 (41.5%)                          | 117 (37.0%)                 | 0.02           |
| Former                            | 142 (45.5%)                      | 143 (45.5%)                         | 162 (52.1%)                          | 165 (52.2%)                 |                |
| Current                           | 14(4.5%)                         | 34 (10.8%)                          | 20 (6.4%)                            | 34 (10.8%)                  |                |
| HDL-C                             | 55.2 (15.7)                      | 55.4 (16.4)                         | 54.8 (16.1)                          | 53.7 (16.4)                 | .15            |
| LDL-C                             | 114. 3 (29.2)                    | 110.4 (27.3)                        | 104.3 (30.9)                         | 95.5 (32.3)                 | <.001          |
| Triglycerides                     | 97 [73, 139]                     | 92 [68, 131]                        | 98 [70, 141]                         | 95 [70, 133]                | 0.6            |
| BMI (kg/m <sup>2</sup> )          | 28.3 (5.1)                       | 28.3 (5.2)                          | 28.3 (5.1)                           | 28.5 (5.8)                  | 0.7            |
| eGFR (ml/min/1.73m <sup>2</sup> ) | 78.5 (11.2)                      | 75.2 (12.2)                         | 70.9 (12.2)                          | 66.6 (13.7)                 | <.001          |
| SBP (mm Hg)                       | 117.3 (18.2)                     | 120.6 (19.7)                        | 123.8 (18.4)                         | 124.3 (19.0)                | <.001          |
| DBP (mm Hg)                       | 69.2 (10.6)                      | 69.2 (9.6)                          | 69.9 (9.3)                           | 66.9 (9.1)                  | 0.002          |
| ECV %                             | 26.3 (2.6)                       | 26.8 (2.7)                          | 26.7 (2.8)                           | 27.1 (2.8)                  | 0.6            |
| LVEF (%)                          | 62.6 (6.5)                       | 62.2 (6.4)                          | 61.6 (7.3)                           | 61.6 (7.1)                  | 0.03           |
| LVEDVI                            | 67.8 (12.7)                      | 66.0 (12.9)                         | 64.9 (13.6)                          | 62.8 (13.9)                 | <.001          |
| LV mass (g)                       |                                  |                                     |                                      |                             |                |

|                                           |              |              |              |              |       |
|-------------------------------------------|--------------|--------------|--------------|--------------|-------|
| Male                                      | 149.7 (32.6) | 147.3 (29.0) | 143.8 (29.0) | 141.7 (27.0) | 0.008 |
| Female                                    | 101.7 (19.0) | 103.5 (21.3) | 102.8 (22.5) | 102.7 (22.0) | 0.8   |
| Abbreviation as per supplemental Table 1a |              |              |              |              |       |

**Supplemental Table 2a.** Patient Characteristics, by hs-cTnT quartile (ng/L), among those with complete LGE measures without incident CVD (n=1737).

|                                   | <b>Quartile 1</b><br>(<5.9 ng/L) | <b>Quartile 2</b><br>(5.9-8.0 ng/L) | <b>Quartile 3</b><br>(8.1-11.2 ng/L) | <b>Quartile 4</b><br>(>11.2 ng/L) | <b>p-value</b> |
|-----------------------------------|----------------------------------|-------------------------------------|--------------------------------------|-----------------------------------|----------------|
| Age                               | 62.1 (5.8)                       | 65.8 (7.3)                          | 68.9 (8.4)                           | 73.5 (9.1)                        | <.001          |
| Male                              | 112 (25.9%)                      | 195 (45.0%)                         | 264 (60.7%)                          | 315 (72.3%)                       | <.001          |
| Race                              |                                  |                                     |                                      |                                   | <.001          |
| Caucasian                         | 178 (41.1%)                      | 210 (48.5%)                         | 174 (40.0%)                          | 213 (48.9%)                       |                |
| Chinese American                  | 65 (15.0%)                       | 34 (7.9%)                           | 41 (9.4%)                            | 24 (5.5%)                         |                |
| Black                             | 85 (19.6%)                       | 100 (23.1%)                         | 120 (27.6%)                          | 127 (29.1%)                       |                |
| Hispanic                          | 105 (24.3%)                      | 89 (20.6%)                          | 100 (23.0%)                          | 72 (16.5%)                        |                |
| Hypertension                      | 152 (35.1%)                      | 219 (50.6%)                         | 254 (58.4%)                          | 307 (70.4%)                       | <.001          |
| Diabetes                          | 41 (9.5%)                        | 48 (11.1%)                          | 83 (19.1%)                           | 106 (24.3%)                       | <.001          |
| Smoking                           |                                  |                                     |                                      |                                   | <.001          |
| Never                             | 223 (51.6%)                      | 185 (42.7%)                         | 177 (40.9%)                          | 169 (39.1%)                       |                |
| Former                            | 171 (39.6%)                      | 209 (48.3%)                         | 215 (49.7%)                          | 238 (55.1%)                       |                |
| Current                           | 38 (8.8%)                        | 39 (9.0%)                           | 41 (9.5%)                            | 25 (5.8%)                         |                |
| HDL-C                             | 56.7 (15.9)                      | 55.8 (15.9)                         | 53.1 (16.5)                          | 53.5 (16.1)                       | 0.8            |
| LDL-C                             | 115.8 (2.9)                      | 108.1 (30.8)                        | 106.9 (32.7)                         | 97.6 (30.4)                       | <.001          |
| Total Chol                        | 195.4 (32.1)                     | 185.1 (35.4)                        | 182.1 (36.8)                         | 172.5 (35.8)                      | .03            |
| BMI (kg/m <sup>2</sup> )          | 27.7 (4.9)                       | 28.6 (5.6)                          | 28.7 (5.0)                           | 2.5 (5.2)                         | .02            |
| eGFR (ml/min/1.73m <sup>2</sup> ) | 78.5 (11.8)                      | 73.8 (12.1)                         | 71.1 (12.3)                          | 66.9 (13.8)                       | .004           |
| SBP (mm Hg)                       | 116.7 (17.4)                     | 121.5 (17.9)                        | 124.5 (19.8)                         | 126.4 (20.3)                      | .002           |
| DBP (mm Hg)                       | 68.2 (9.3)                       | 69.0 (10.3)                         | 69.8 (9.4)                           | 68.9 (9.9)                        | 0.2            |

|                                                                                                                                                                                                                                                                                                                                                           |              |              |              |              |       |
|-----------------------------------------------------------------------------------------------------------------------------------------------------------------------------------------------------------------------------------------------------------------------------------------------------------------------------------------------------------|--------------|--------------|--------------|--------------|-------|
| Prevalent LGE                                                                                                                                                                                                                                                                                                                                             | 3 (0.7%)     | 17 (3.9%)    | 27 (6.2%)    | 65 (14.9%)   | <.001 |
| LVEF (%)                                                                                                                                                                                                                                                                                                                                                  | 62.8 (6.1)   | 62.0 (6.7)   | 61.6 (6.9)   | 60.1 (7.5)   | .08   |
| LVEDVI                                                                                                                                                                                                                                                                                                                                                    | 64.4 (11.1)  | 65.9 (12.6)  | 65.8 (14.7)  | 66.7 (15.0)  | .06   |
| LV mass (g)                                                                                                                                                                                                                                                                                                                                               |              |              |              |              |       |
| Male                                                                                                                                                                                                                                                                                                                                                      | 135.5 (23.2) | 144.9 (25.4) | 144.9 (28.5) | 150.9 (33.8) | <.001 |
| Female                                                                                                                                                                                                                                                                                                                                                    | 99.9 (18.5)  | 105.7 (21.8) | 107.0 (20.8) | 112.2 (27.0) | <.001 |
| Blood pressure, BP; Body mass index, BMI; Cardiac magnetic resonance, CMR; Estimated glomerular filtration rate, eGFR; Extra cellular volume, ECV; High density lipoprotein cholesterol; HDL-C; Hypertension, HTN; Low density lipoprotein cholesterol, LDL-C; Left ventricular diastolic volume index, LVEDVI; Left ventricular ejection fraction, LVEF. |              |              |              |              |       |

**Supplemental Table 2b.** Patient Characteristics, by hs-cTnT quartile (ng/L), among those with complete ECV measures without incident CVD (N=1258).

|                                   | <b>Quartile 1</b><br>(<5.84 ng/L) | <b>Quartile 2</b><br>(5.84-8.02 ng/L) | <b>Quartile 3</b><br>8.03-11.22 ng/L) | <b>Quartile 4</b><br>>11.22 ng/L) | <b>p-value</b> |
|-----------------------------------|-----------------------------------|---------------------------------------|---------------------------------------|-----------------------------------|----------------|
| Age                               | 62.3 (6.0)                        | 65.8 (7.4)                            | 68.5 (8.3)                            | 72.9 (9.2)                        | <.001          |
| Male                              | 78 (24.9%)                        | 136 (43.0%)                           | 198 (63.3%)                           | 232 (73.4%)                       | <.001          |
| Race                              |                                   |                                       |                                       |                                   | <.001          |
| Caucasian                         | 147 (47.0%)                       | 171 (54.1%)                           | 149 (47.6%)                           | 179 (56.7%)                       |                |
| Chinese American                  | 59 (18.9%)                        | 31 (9.8%)                             | 32 (10.2%)                            | 21 (6.7%)                         |                |
| Black                             | 57 (18.2%)                        | 68 (21.5%)                            | 83 (26.5%)                            | 81 (25.6%)                        |                |
| Hispanic                          | 50 (16.0%)                        | 46 (14.6%)                            | 49 (15.7%)                            | 35 (11.1%)                        |                |
| Hypertension                      | 110 (35.1%)                       | 157 (49.7%)                           | 180 (57.5%)                           | 214 (67.7%)                       | <.001          |
| Diabetes                          | 827 (8.6%)                        | 36 (11.4%)                            | 56 (17.9%)                            | 74 (23.4%)                        | <.001          |
| Smoking                           |                                   |                                       |                                       |                                   | <.001          |
| Never                             | 158 (50.6%)                       | 132 (41.8%)                           | 129 (41.2%)                           | 121 (38.7%)                       |                |
| Former                            | 126 (40.4%)                       | 157 (49.7%)                           | 158 (50.5%)                           | 171 (54.6%)                       |                |
| Current                           | 28 (9.0%)                         | 27 (8.5%)                             | 26 (8.3%)                             | 21 (6.7%)                         |                |
| HDL-C                             | 47 (16.5)                         | 55.4 (15.6)                           | 52.3 (15.2)                           | 52.6 (15.7)                       | 0.5            |
| LDL-C                             | 115.6 (28.4)                      | 106.4 (28.8)                          | 106.7 (32.1)                          | 96.0 (29.5)                       | 0.2            |
| Total Chol                        | 195.8 (31.8)                      | 183.3 (34.9)                          | 181.3 (36.1)                          | 170.8 (34.6)                      | 0.1            |
| BMI (kg/m <sup>2</sup> )          | 27.5 (5.0)                        | 28.5 (5.7)                            | 28.7 (4.8)                            | 28.8 (5.4)                        | .01            |
| eGFR (ml/min/1.73m <sup>2</sup> ) | 78.7 (11.5)                       | 73.2 (12.4)                           | 71.2 (12.1)                           | 68.1 (14.0)                       | .004           |
| SBP (mm Hg)                       | 116.5 (18.3)                      | 119.5 (17.0)                          | 124.3 (19.4)                          | 125.6 (20.0)                      | .02            |
| DBP (mm Hg)                       | 67.6 (9.5)                        | 68.1 (10.0)                           | 69.8 (9.4)                            | 68.9 (9.9)                        | 0.7            |



|             |              |              |              |              |       |
|-------------|--------------|--------------|--------------|--------------|-------|
| ECV %       | 26.6 (2.6)   | 26.8 (2.7)   | 26.4 (2.6)   | 27.1 (3.1)   | .007  |
| LVEF (%)    | 63.4 (6.1)   | 62.4 (6.7)   | 61.8 (6.8)   | 60.4 (7.3)   | .01   |
| LVEDVI      | 63.8 (11.0)  | 63.4 (12.6)  | 65.8 (14.3)  | 66.5 (15.2)  | <.001 |
| LV mass (g) |              |              |              |              |       |
| Male        | 133.5 (22.8) | 144.6 (26.0) | 145.1 (27.9) | 150.3 (33.2) | <.001 |
| Female      | 98.0 (18.4)  | 104.3 (21.8) | 104.5 (19.0) | 109.5 (26.4) | <.001 |

Blood pressure, BP; Body mass index, BMI; Cardiac magnetic resonance, CMR; Estimated glomerular filtration rate, eGFR; Extra cellular volume, ECV; High density lipoprotein cholesterol; HDL-C; Hypertension, HTN; Low density lipoprotein cholesterol, LDL-C; Left ventricular diastolic volume index, LVEDVI; Left ventricular ejection fraction, LVEF.

**Supplemental Table 3:** Association of GDF-15 and hs-cTnT with % ECV (continuous outcome variable).

|                                                                                                    | <b>Unadjusted</b>            | <b>Demographic Adjusted</b>  | <b>Demographic + Risk Factor + LV Mass Adjusted</b> |
|----------------------------------------------------------------------------------------------------|------------------------------|------------------------------|-----------------------------------------------------|
| In GDF-15                                                                                          | 0.73 (0.41, 1.06)<br>P<.001  | 0.23 (-0.12, 0.59)<br>p=0.2  | 0.19 (-0.21, 0.59)<br>p=0.3                         |
| <b>GDF-15 Quartiles (ng/L)</b>                                                                     |                              |                              |                                                     |
| Q1 (<736)                                                                                          | Ref                          | Ref                          | Ref                                                 |
| Q2 (736-971)                                                                                       | 0.44 (0.00, 0.87)<br>p=0.2   | 0.13 (-0.28, 0.56)<br>p=0.5  | 0.07 (-0.34, 0.49)<br>p=0.7                         |
| Q3 (1000-1426)                                                                                     | 0.42 (-.01, 0.85)<br>p=0.6   | -0.15 (-0.60, 0.30)<br>p=0.5 | -0.17, (-0.62, 0.23)<br>p=0.5                       |
| Q4 (>1427)                                                                                         | 0.82 (0.39, 1.25)<br>p=0.03  | 0.09 (-0.37, 0.56)<br>p=0.7  | 0.03, (-0.47, 0.53)<br>p=0.9                        |
| <b>hs-cTnT Quartiles (ng/L)</b>                                                                    |                              |                              |                                                     |
| Q1 (<6)                                                                                            | Ref                          | Ref                          | Ref                                                 |
| Q2 (6-8)                                                                                           | 0.15 (-0.28, 0.58)<br>p=0.4  | 0.13 (-0.29, 0.55)<br>p=0.5  | 0.24 (-0.19, 0.67)<br>p=0.3                         |
| Q3 (8, 11)                                                                                         | -0.23 (-0.67, 0.19)<br>p=0.4 | -0.19 (-0.63, 0.27)<br>p=0.4 | -0.01 (-0.47, 0.46)<br>p=0.9                        |
| Q4 (>11)                                                                                           | 0.48 (0.05, 0.91)<br>p=0.2   | 0.37 (-0.13, 0.87)<br>p=0.1  | 0.57 (0.04, 1.09)<br>p=.04                          |
| Cell values represent beta-coefficients from linear regression models and 95% confidence intervals |                              |                              |                                                     |
| Demographics: age, gender, race/ethnicity (Black, White Chinese American, Hispanic)                |                              |                              |                                                     |
| Risk Factors: Hypertension, Diabetes, Lipids, Smoking, estimated glomerular filtration rate        |                              |                              |                                                     |

Extra cellular volume, ECV; Growth Differentiation Factor-15, GDF-15; high sensitivity cardiac troponin T, hs-cTnT; Left ventricle, LV; Natural log, ln; Quartile, Q
